# Supplementary material for: Complex coacervation of hyaluronic acid and chitosan: effects of pH, ionic strength, charge density, chain length and the charge ratio
Source: Royal Society of Chemistry journal article supplement (doi:10.1039/c5sm01829c), 2015-01-01
Supplement: c5sm01829c1.pdf [file c5sm01829c1.pdf]

## Supplementary Information

### **Complex Coacervation of Hyaluronic Acid with Chitosan: Effect of pH, $I$ , charge density, chain length and charge ratio**

A. Basak Kayitmazer<sup>\*</sup>, Alaaddin F. Koksal, Elif Kilic Iyilik

To whom correspondence should be addressed; Email: [basak.kayitmazer@boun.edu.tr](mailto:basak.kayitmazer@boun.edu.tr)

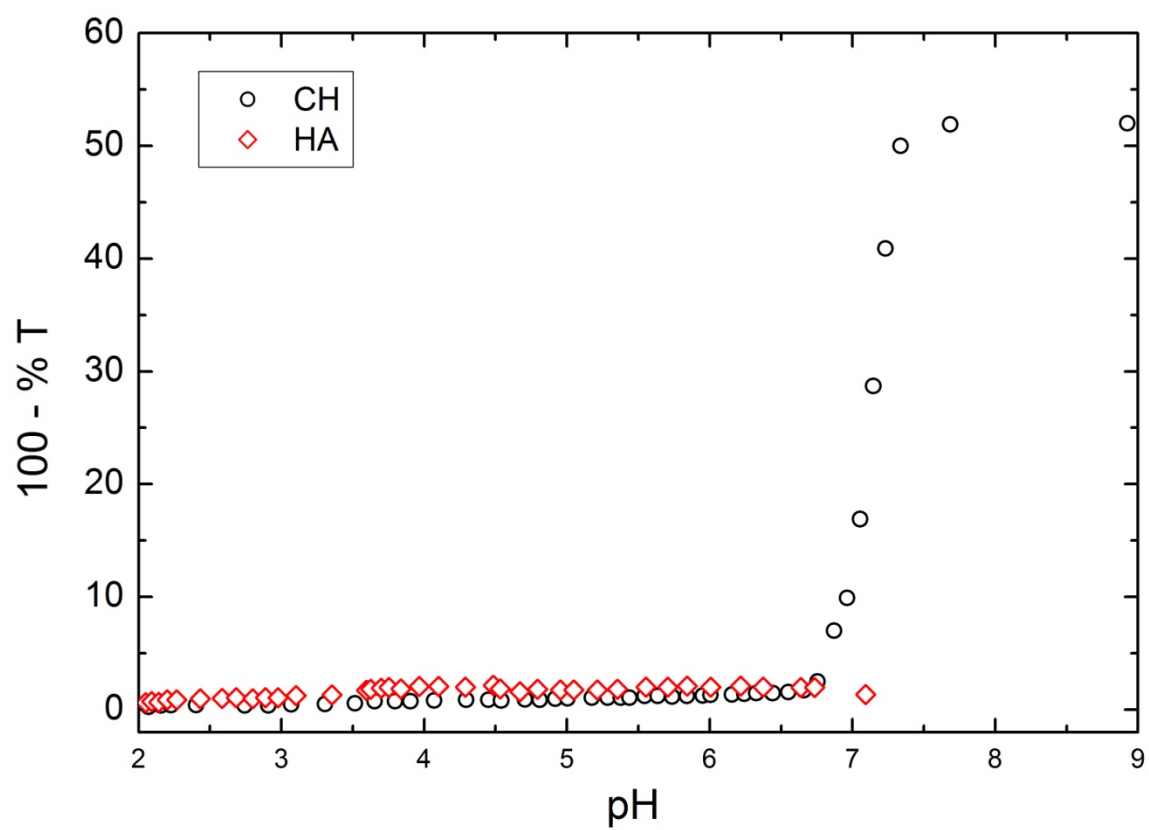

**Fig. S1.** Turbidity (100-%T) vs. pH plot for HA and CH in 0.3 M NaCl.  $C_p = 0.5$  g/L.

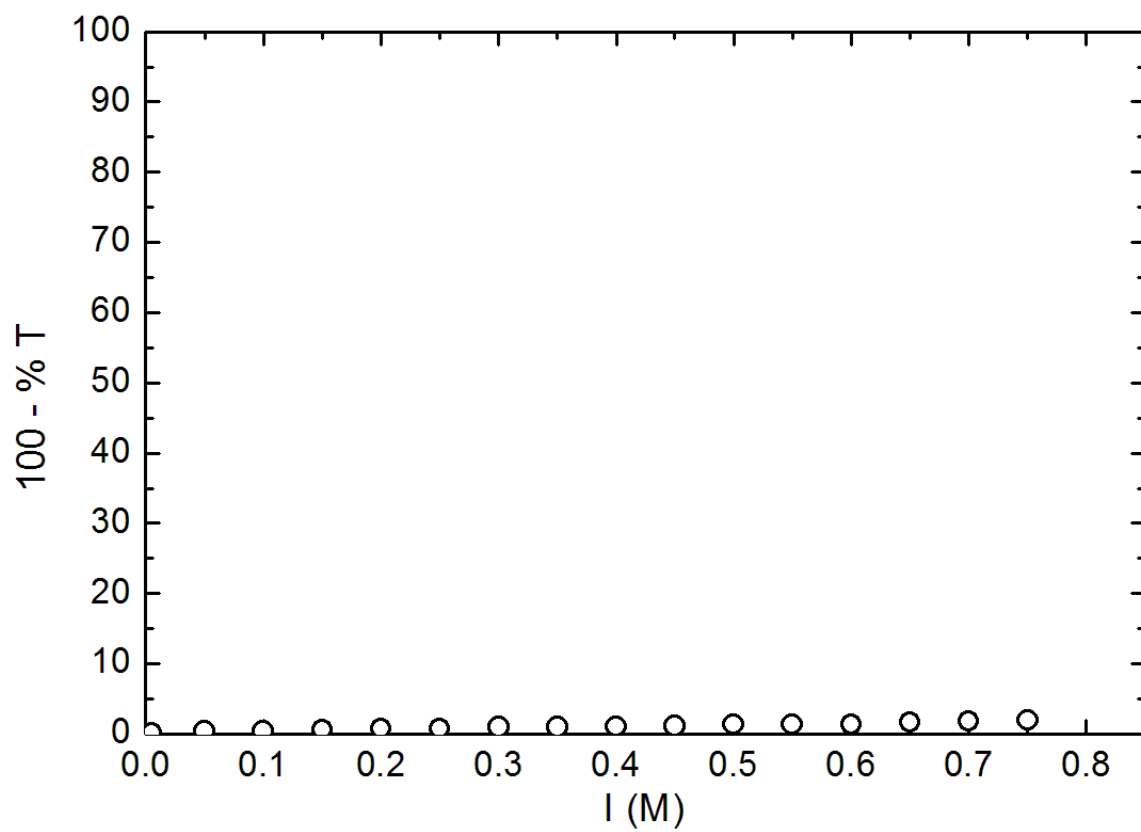

**Fig. S2.** Turbidity (100-%T) vs.  $I$  for CH at pH = 3.0 and  $C_p = 0.5$  g/L.
