# Supplementary material for: Complex coacervation of hyaluronic acid and chitosan: effects of pH, ionic strength, charge density, chain length and the charge ratio
Source: Royal Society of Chemistry journal article supplement (doi:10.1039/c5sm01829c), 2015-01-01
Supplement: c5sm01829c3.pdf [file c5sm01829c3.pdf]

**Title of video:** Droplets of hyaluronic acid/chitosan coacervates.

**Keywords:** Complex coacervation, polyelectrolytes, hyaluronic acid, chitosan, self-assembly, semiflexible.

**Video legend:** Moving circular objects are coacervate microdroplets made of hyaluronic acid and chitosan. Charge ratio of  $[-]/[+] = 0.46$ , ionic strength = 0.05 M, pH = 3.0, degree of deacetylation of chitosan = 83%.
